# Supplementary material for: A pyridine-N-oxide catenane for cation recognition
Source: Royal Society of Chemistry journal article supplement (doi:10.1039/d4ob00176a), 2024-01-01
Supplement: d4ob00176a1.pdf [file d4ob00176a1.pdf]

## Electronic Supplementary Information

### A pyridine-*N*-oxide catenane for cation recognition

Sean R. Barlow, Nathan R. Halcovitch and Nicholas H. Evans\*

Department of Chemistry, Lancaster University, Lancaster, LA1 4YB, UK

Email: [n.h.evans@lancaster.ac.uk](mailto:n.h.evans@lancaster.ac.uk)

#### Contents:

|                                                 |     |
|-------------------------------------------------|-----|
| Part 1: Spectral Data for Main Article.....     | S2  |
| Part 2: <sup>1</sup> H NMR Binding Studies..... | S9  |
| Part 3: Crystallographic Data.....              | S16 |
| Part 4: References.....                         | S20 |

## Part 1: Spectral Data for Main Article

### Pyridyl [2]Catenane 2

$^1\text{H}$  NMR (400 MHz,  $\text{CDCl}_3$ )

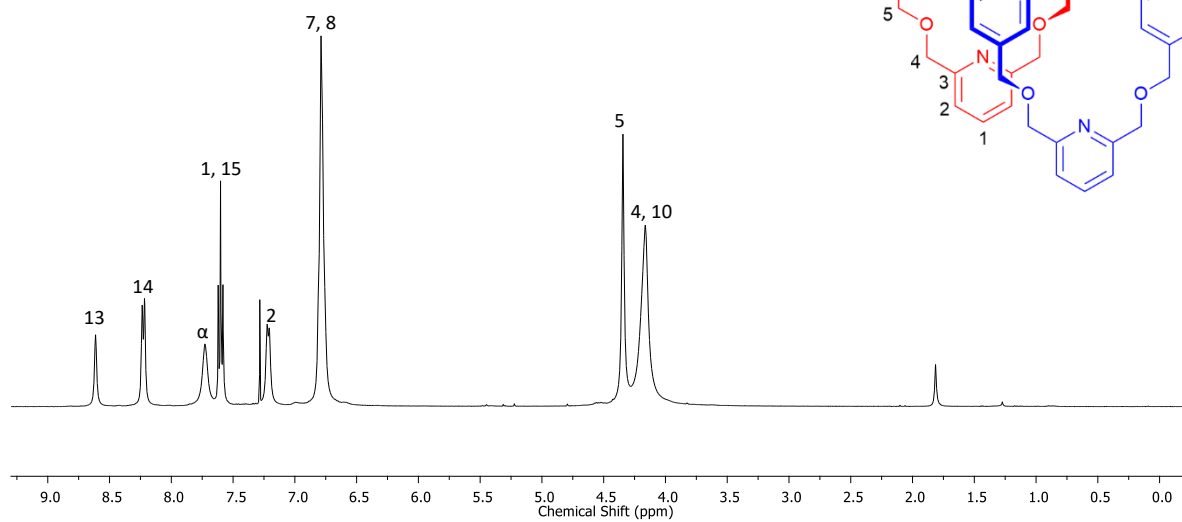

$^{13}\text{C}$  NMR (100 MHz,  $\text{CDCl}_3$ )

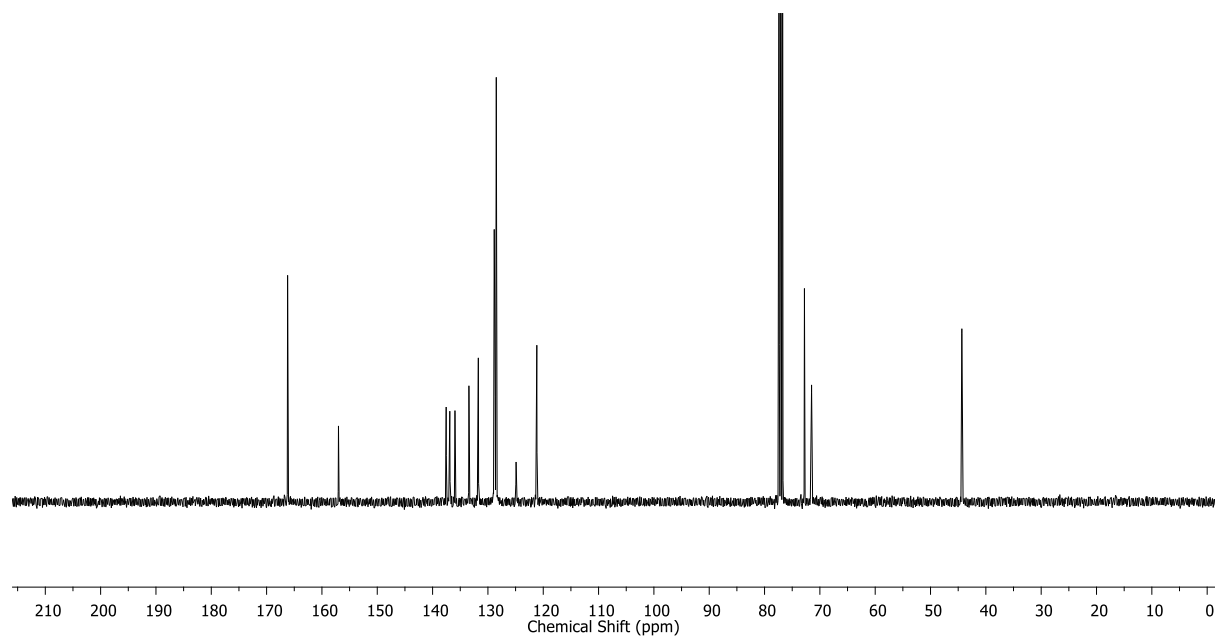

### IR (neat)

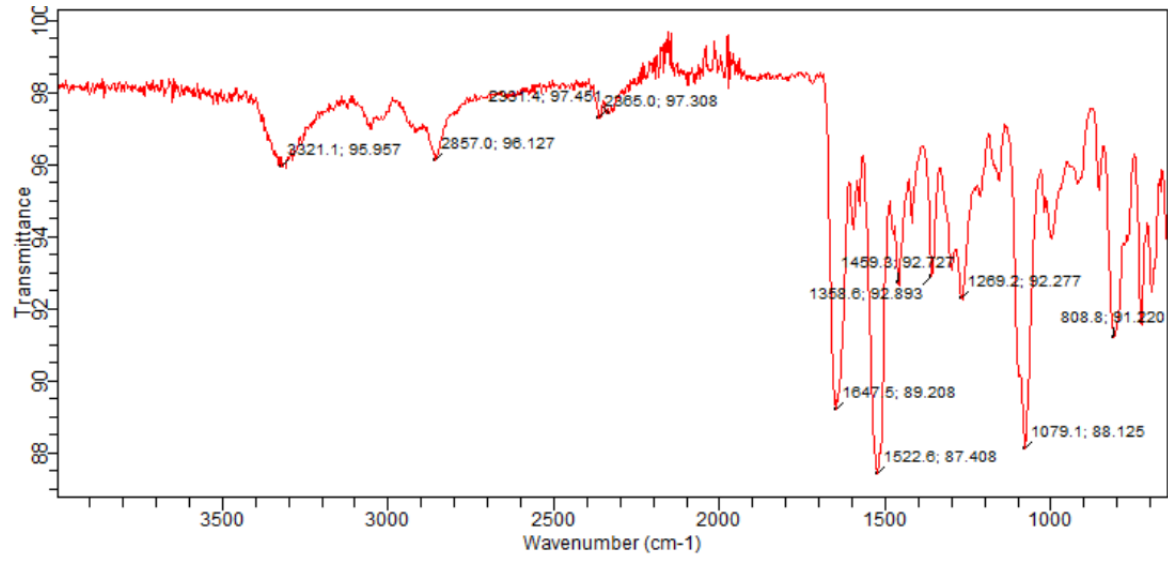

### MS (ES +ve)

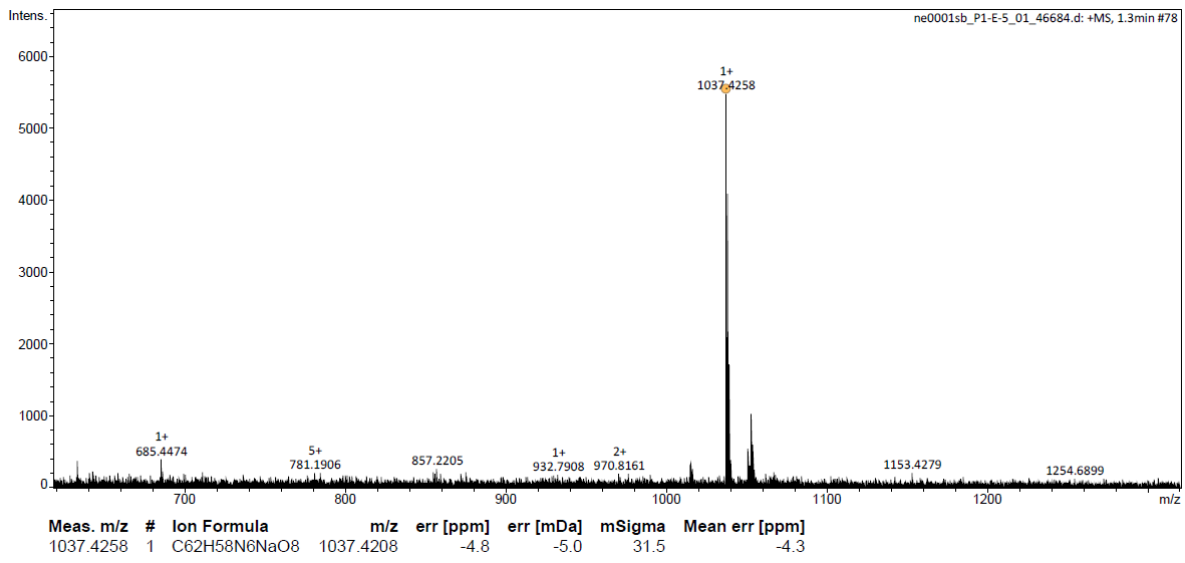

### Macrocycle 3

$^1\text{H}$  NMR (400 MHz,  $\text{CDCl}_3$ )

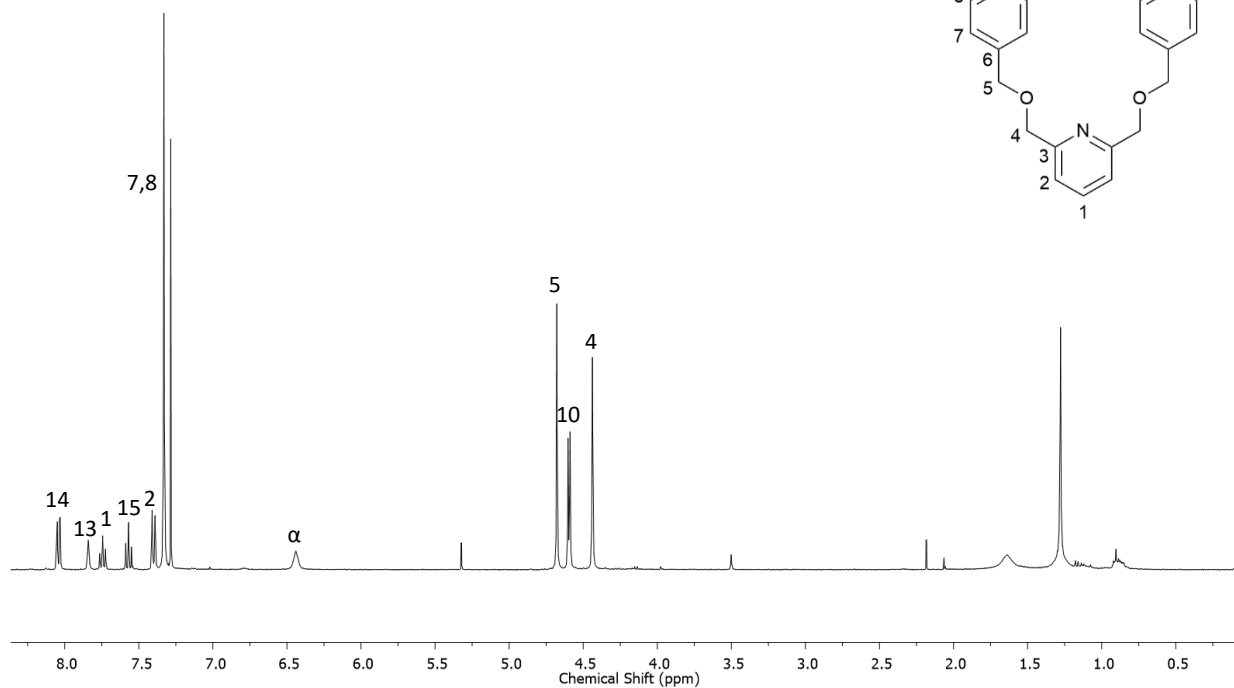

$^{13}\text{C}$  NMR (400 MHz,  $\text{CDCl}_3$ )

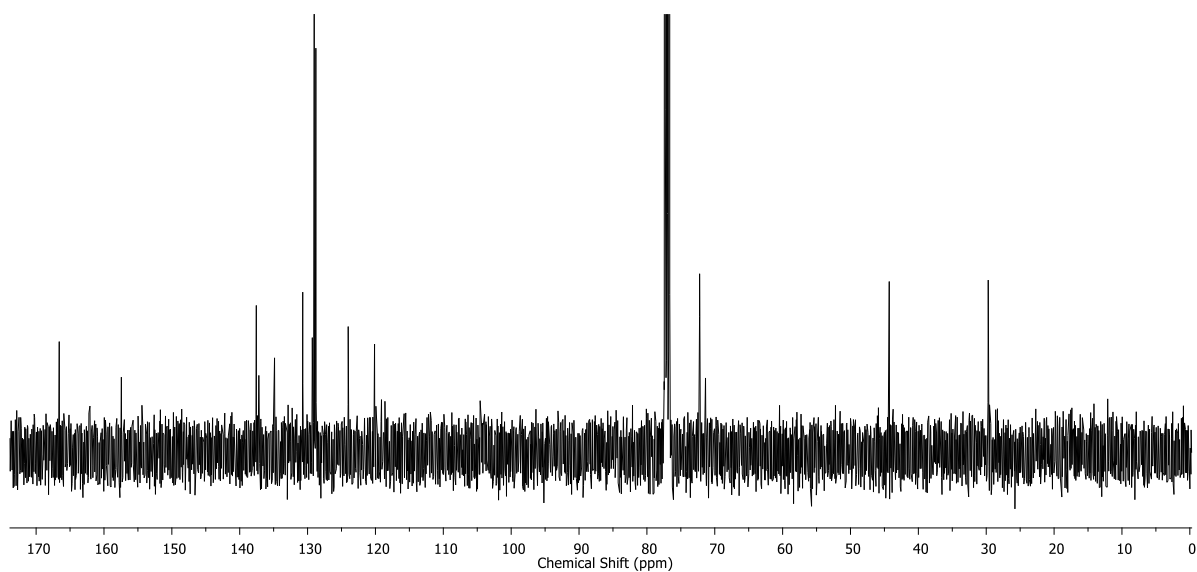

## IR (neat)

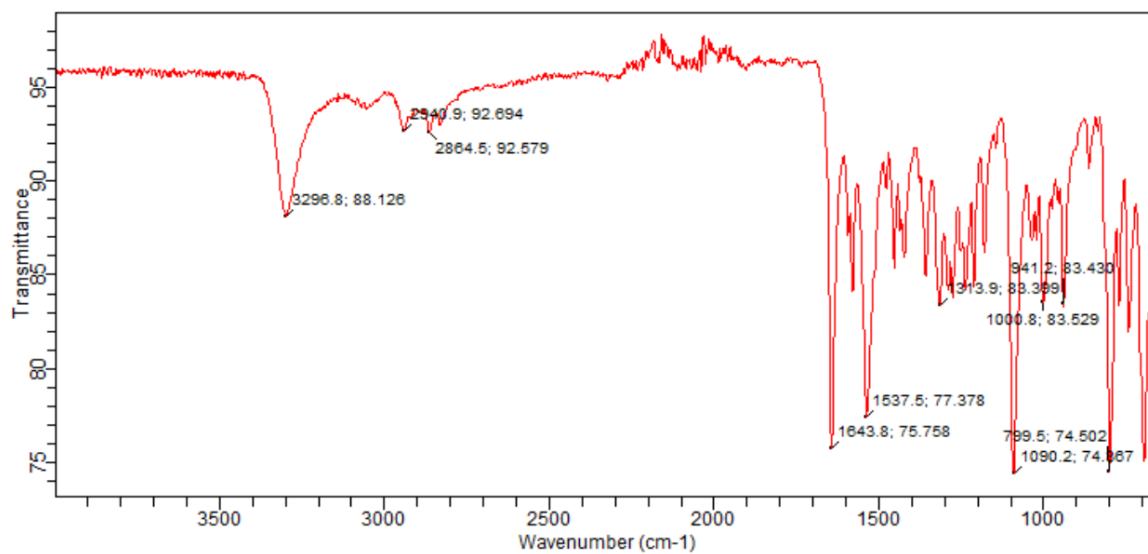

## MS (ES +ve)

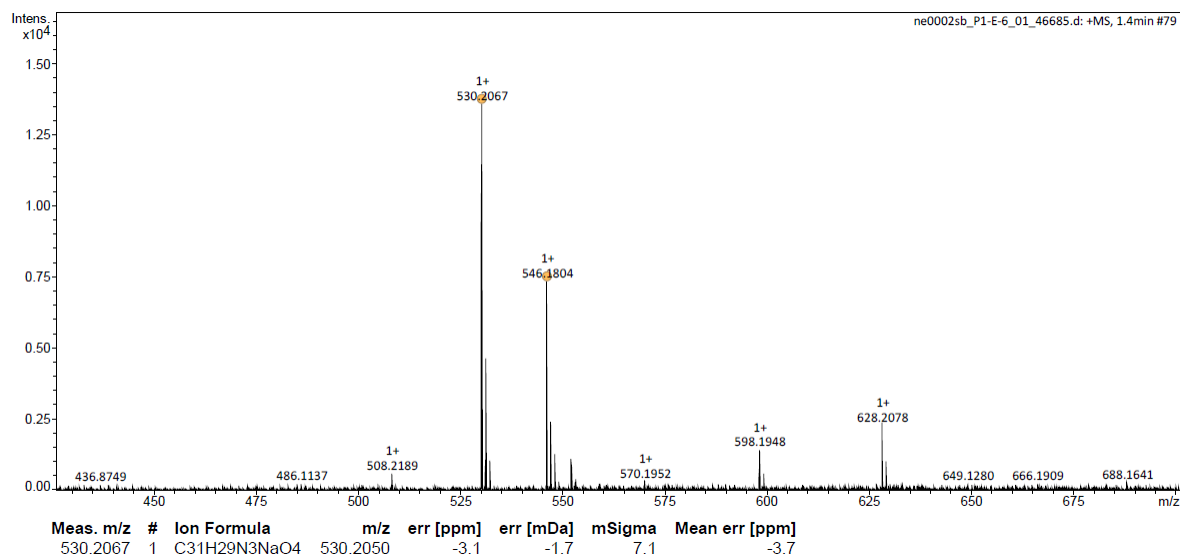

## PNO [2]Catenane 4

$^1\text{H}$  NMR (400 MHz,  $\text{CDCl}_3$ )

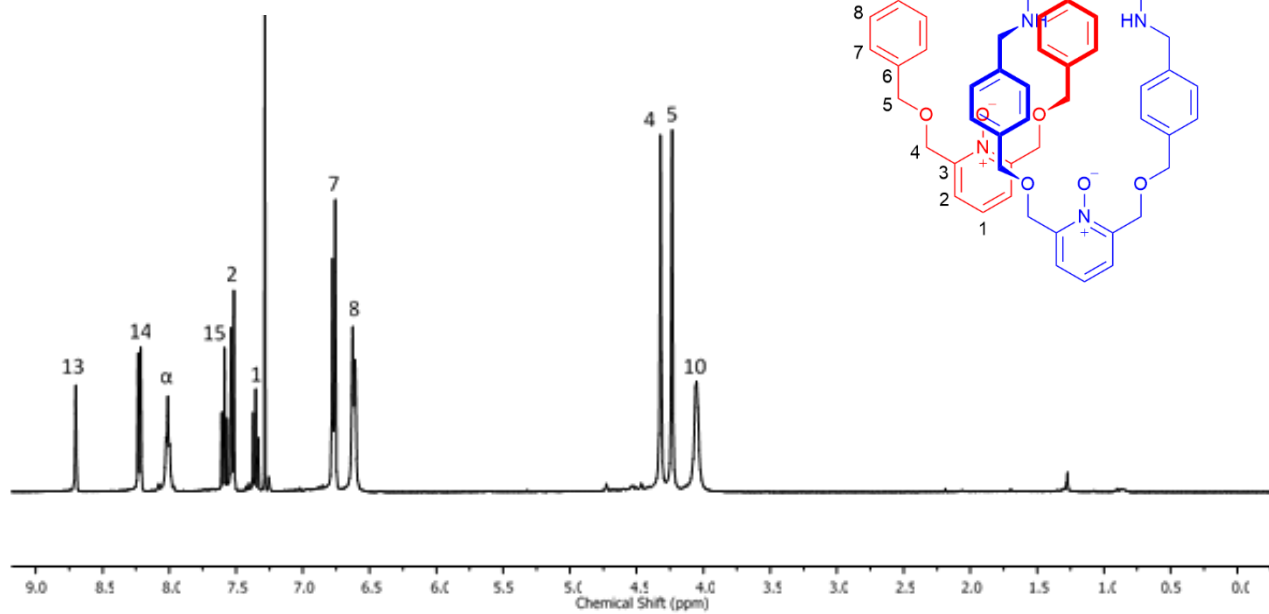

$^{13}\text{C}$  NMR (400 MHz,  $\text{CDCl}_3$ )

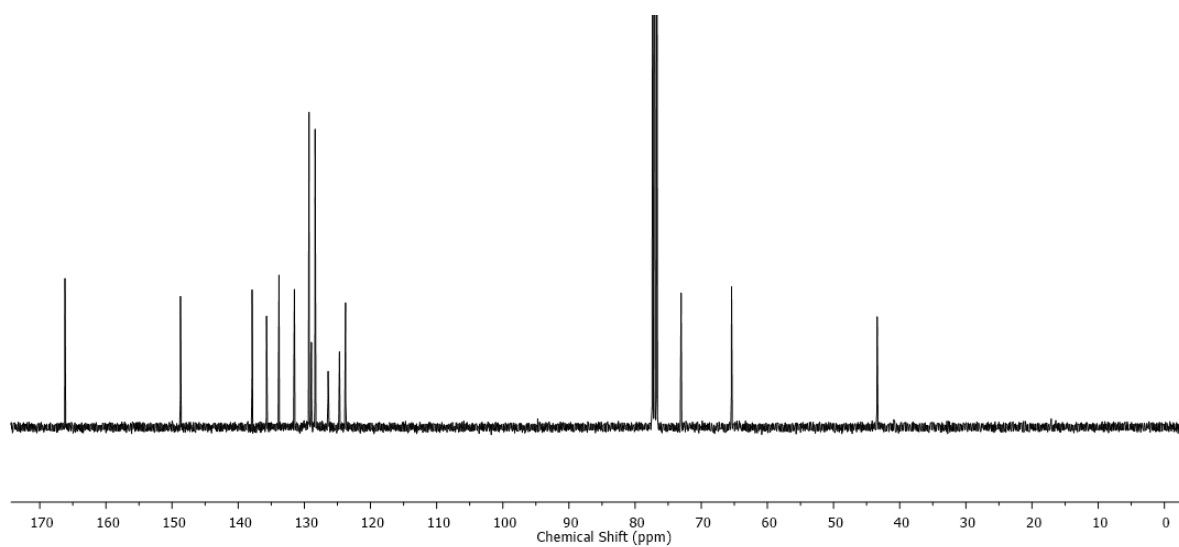

## IR (neat)

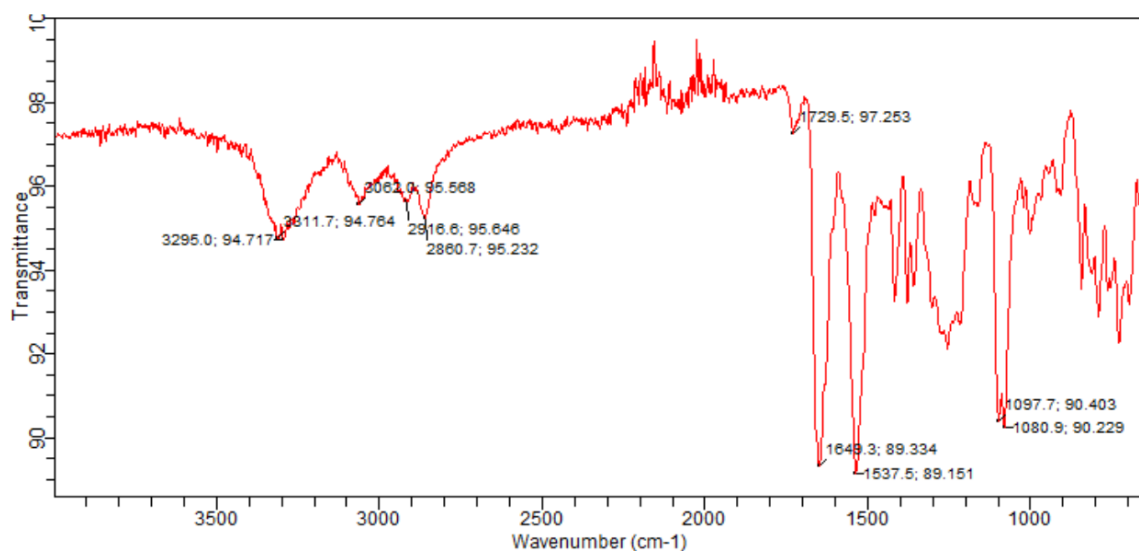

## MS (ES +ve)

Measured region for 1047.4245 m/z

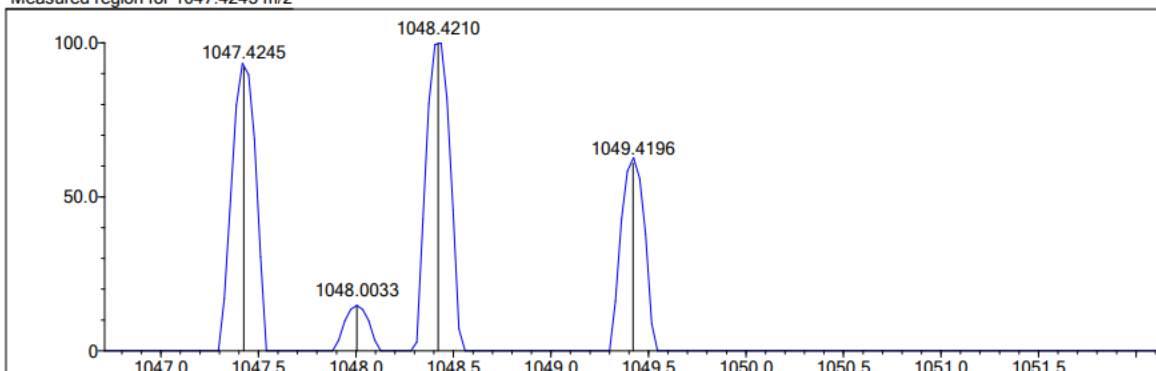

C62 H58 N6 O10 [M+H]<sup>+</sup> : Predicted region for 1047.4287 m/z

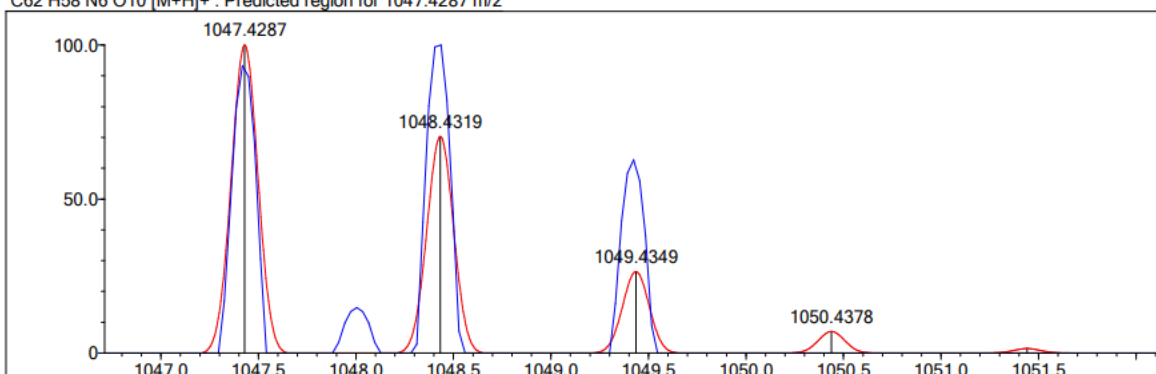

| Rank | Score | Formula (M)    | Ion                | Meas. m/z | Pred. m/z | Df. (mDa) | Df. (ppm) | Iso  | DBE  |
|------|-------|----------------|--------------------|-----------|-----------|-----------|-----------|------|------|
| 1    | 0.00  | C62 H58 N6 O10 | [M+H] <sup>+</sup> | 1047.4245 | 1047.4287 | -4.2      | -4.01     | 0.00 | 37.0 |

**$^1\text{H}$ - $^1\text{H}$  ROESY NMR of [2]catenane 4 (400 MHz,  $\text{CDCl}_3$ , 298 K).**

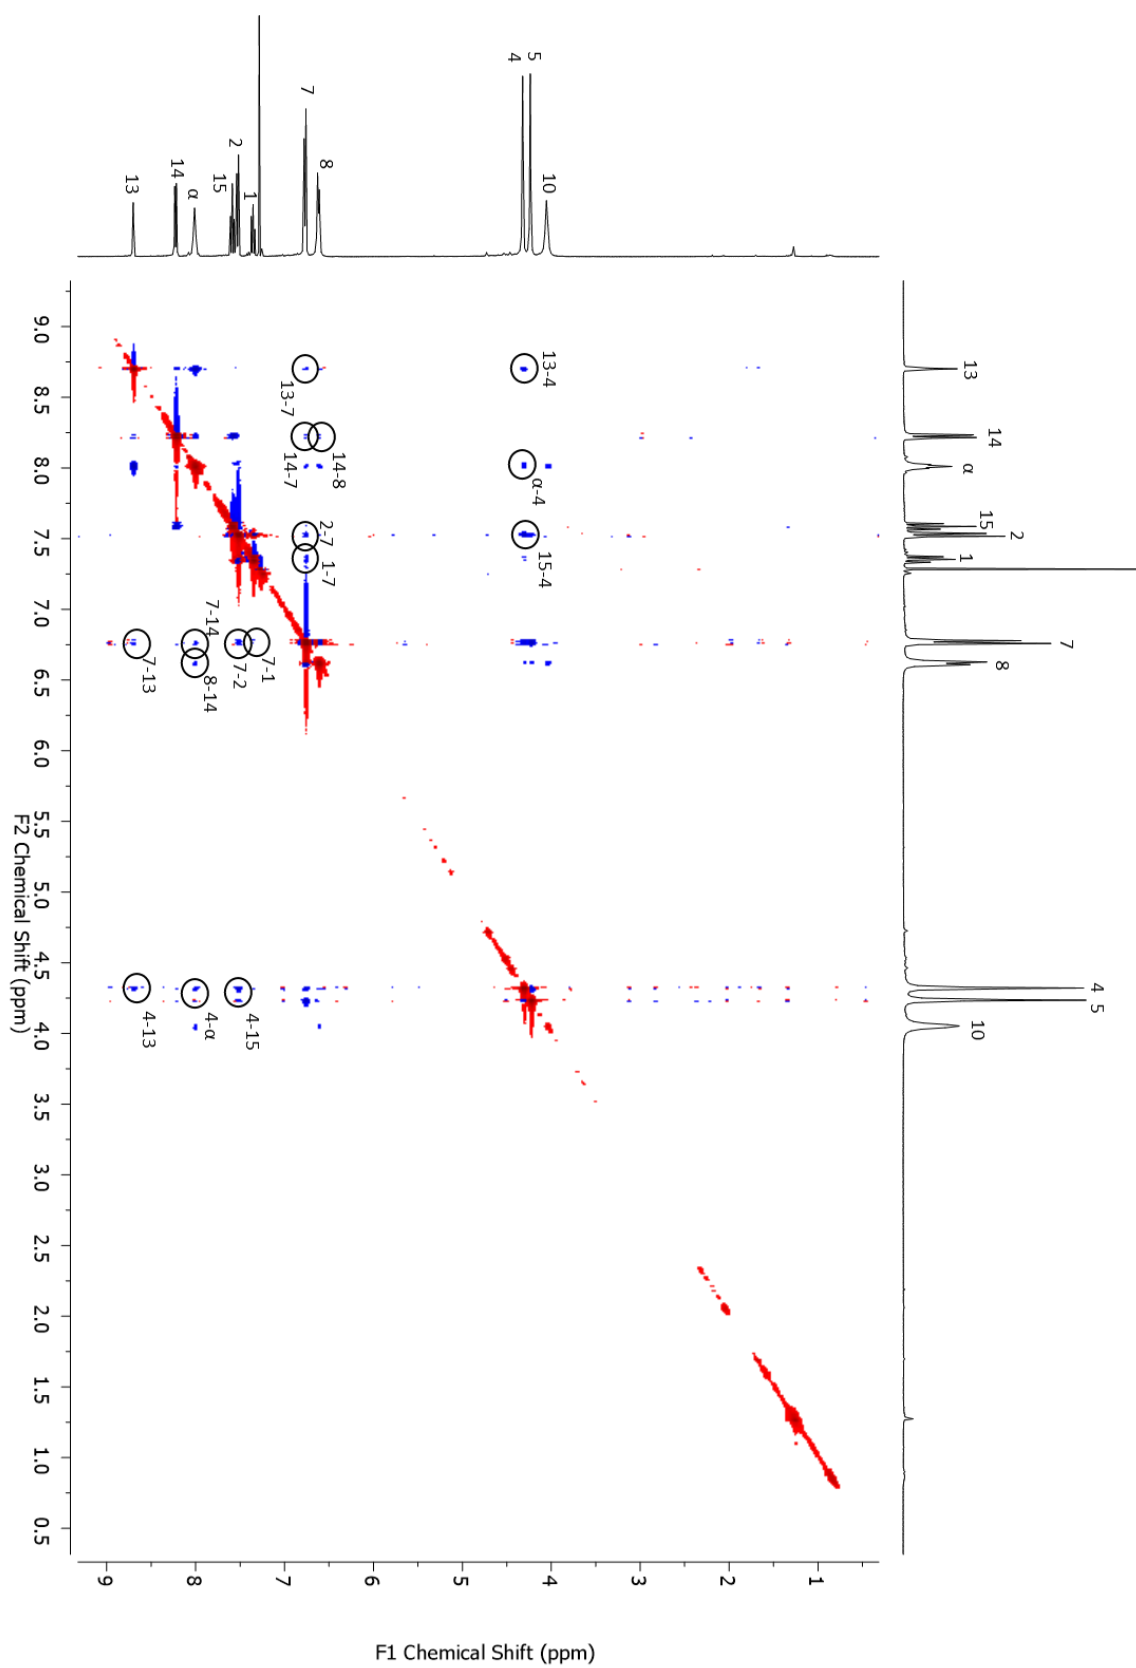

Inter-component through-space cross-peaks are circled.



## Part 2: $^1\text{H}$ NMR Binding Studies

### General Procedures

#### *(a) Trifluoroacetic Acid Titration Procedure*

A 0.25 M solution of TFA was added to 500  $\mu\text{L}$  of a 2.50 mM  $\text{CDCl}_3$  solution of PNO [2]catenane **4** at 298 K. The volumes added were 5, 5, 15, 25, 50, 50, 50 & 50  $\mu\text{L}$  (i.e. in total 50 equivalents of TFA). A  $^1\text{H}$  NMR spectrum was acquired after each addition. Then 50 equivalents of base ( $d_5$ -pyridine, dissolved in 125  $\mu\text{L}$  of  $\text{CDCl}_3$ ) was added and a final  $^1\text{H}$  NMR spectrum acquired.

On BindFit,<sup>1</sup> attempts were made at fitting to both 1:1<sup>2</sup> and 1:2<sup>3</sup> binding models using the chemical shift values (and thus  $\Delta\delta_{\text{H}}$ ) for protons *1* and *13* of PNO [2]catenane **4**. However, the data did not reasonably fit either model (see below).

#### *(b) Alkali Metal Titration Procedure*

A 0.15 M solution of alkali metal salt ( $\text{LiClO}_4$  or  $\text{NaBARF}$ ) was added to 500  $\mu\text{L}$  of a 2.50 mM solution of PNO [2]catenane **4** in 4:1  $\text{CDCl}_3/\text{CD}_3\text{CN}$  at 298 K. A  $^1\text{H}$  NMR spectrum was acquired after each addition. The volumes added were 2, 2, 2, 2, 2, 5, 10, 20, 50, 100, 100, 100 and 100  $\mu\text{L}$  (i.e. in total 50 equivalents of  $\text{M}^+$ ).

In both cases, the data was fitted globally on BindFit<sup>1</sup> using the chemical shift values (and thus  $\Delta\delta_{\text{H}}$ ) for protons *2*, *4*, *7*, *13* and *14* of PNO [2]catenane **4**. The models fitted to were:

- 1:2 binding model for  $\text{LiClO}_4$ .<sup>4</sup>
- 1:1 binding model for  $\text{NaBARF}$ .<sup>5</sup>

## Ion Binding $^1\text{H}$ NMR Titration Experimental Data

PNO [2]catenane **4** + TFA

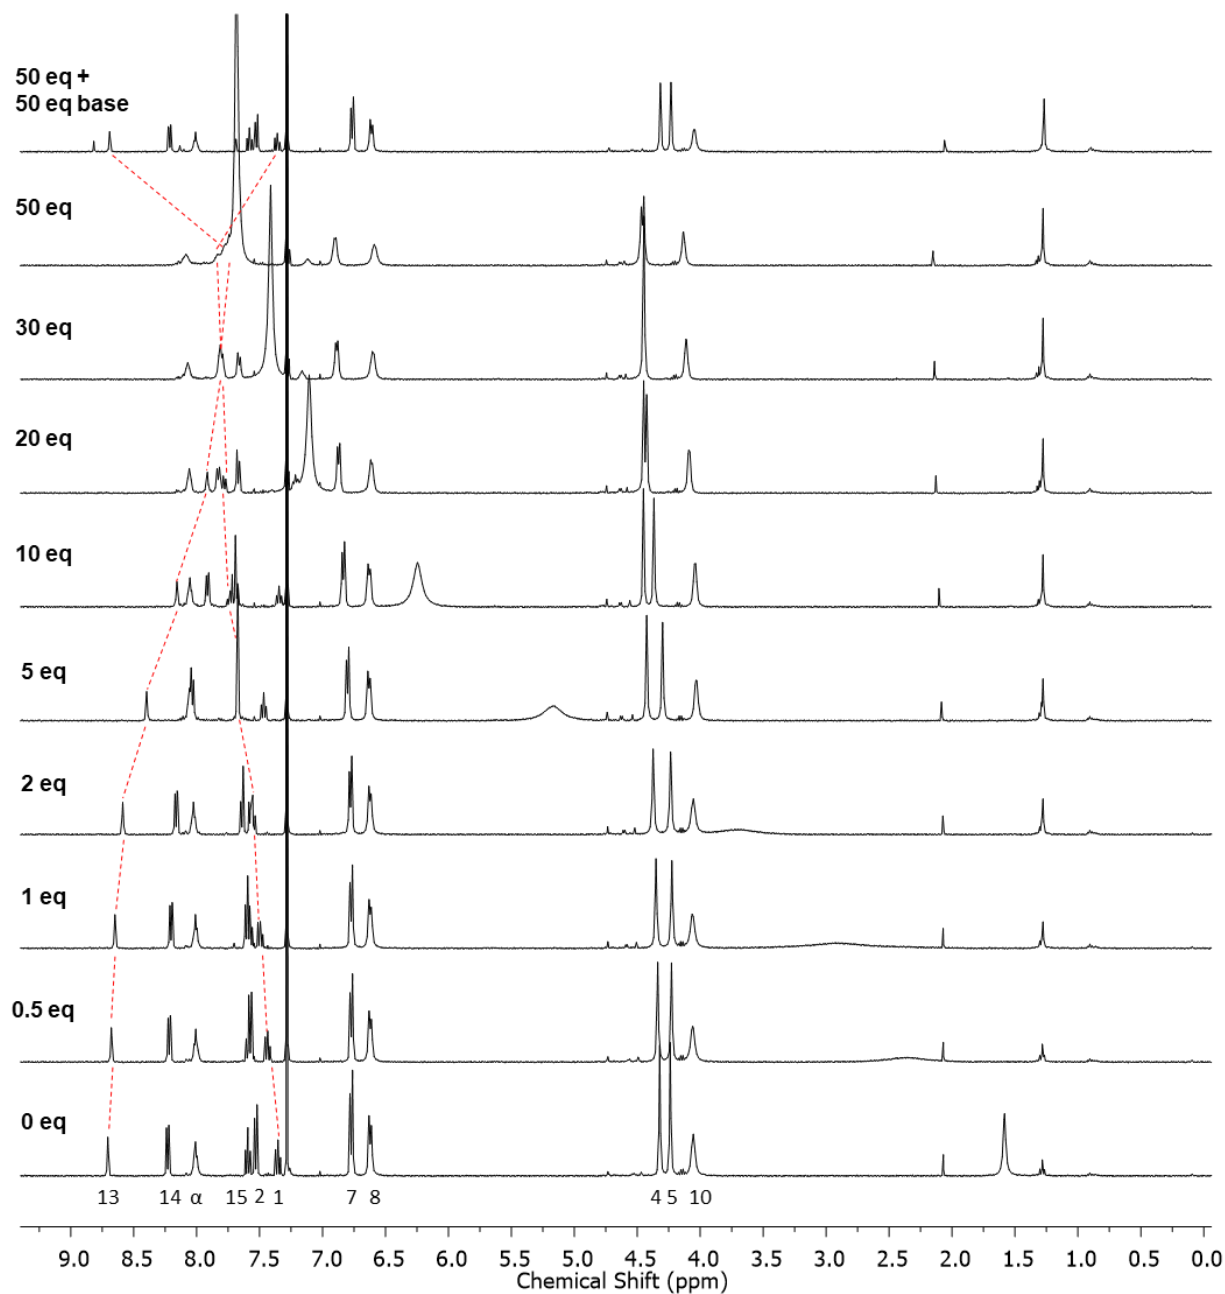

Stacked NMR spectra (400 MHz,  $\text{CDCl}_3$ , 298 K) of PNO [2]catenane **4** upon addition of increasing equivalents of TFA followed by a single addition of 50 equivalents of  $d_5$ -pyridine.

NB: Extra aromatic peaks in top spectrum attributed to trace quantities of protic pyridine.

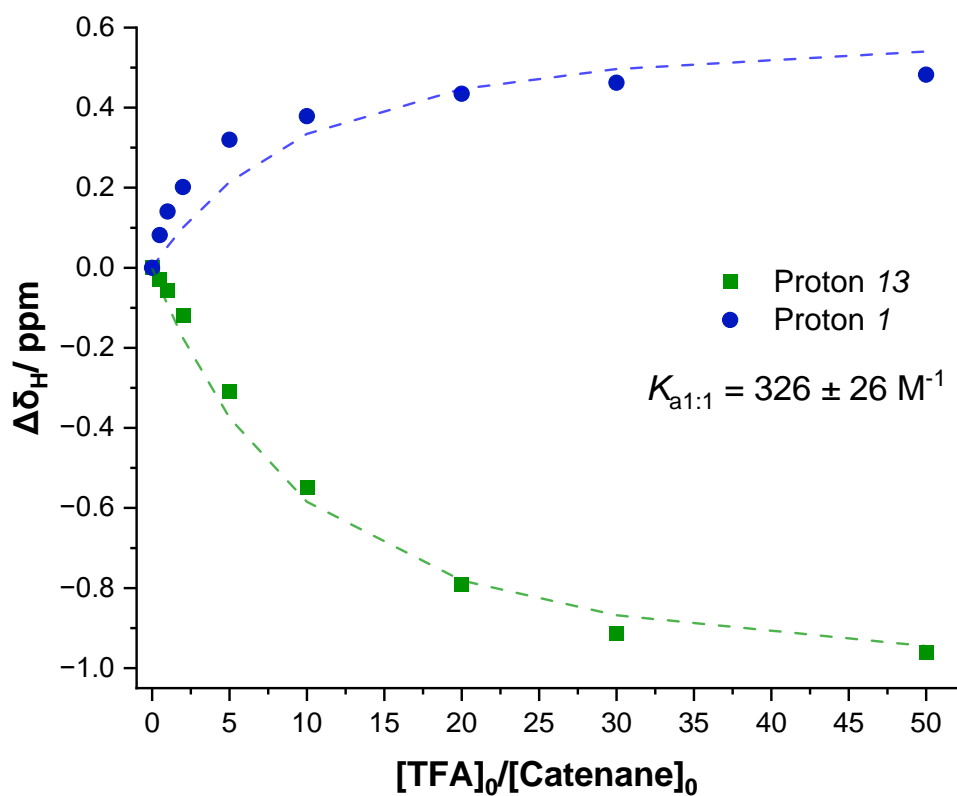

Globally fitted data (by Bindfit) for a 1:1 binding isotherm using change in peak positions against a ratio of initial TFA and catenane concentration.

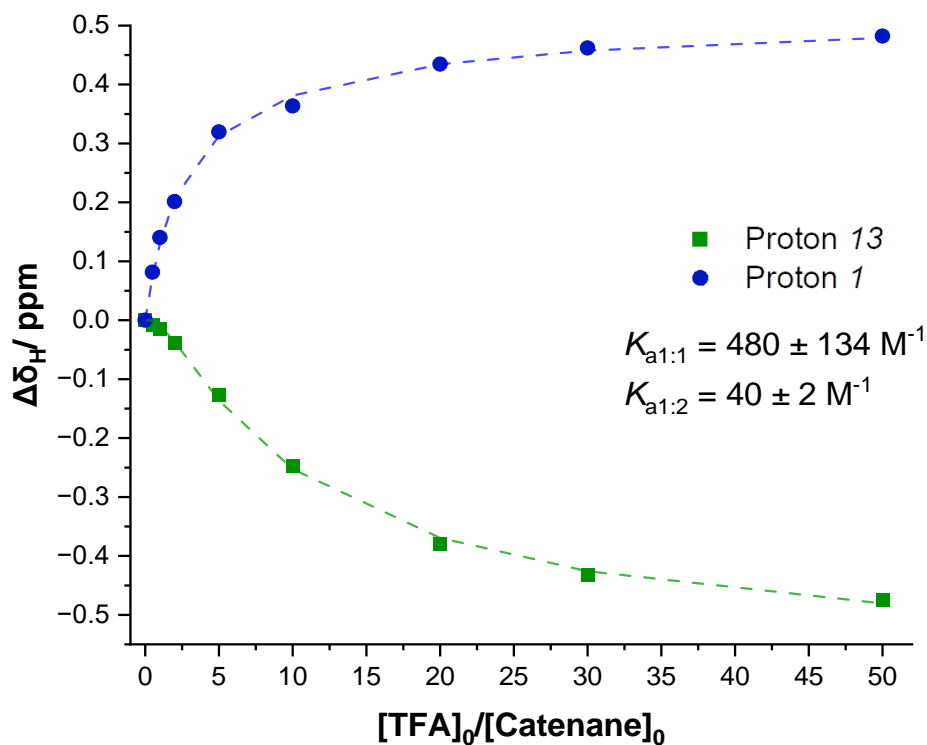

Globally fitted data (by Bindfit) for a 1:2 binding isotherm using change in peak positions against a ratio of initial TFA and catenane concentration.

PNO [2]catenane **4** + LiClO<sub>4</sub>

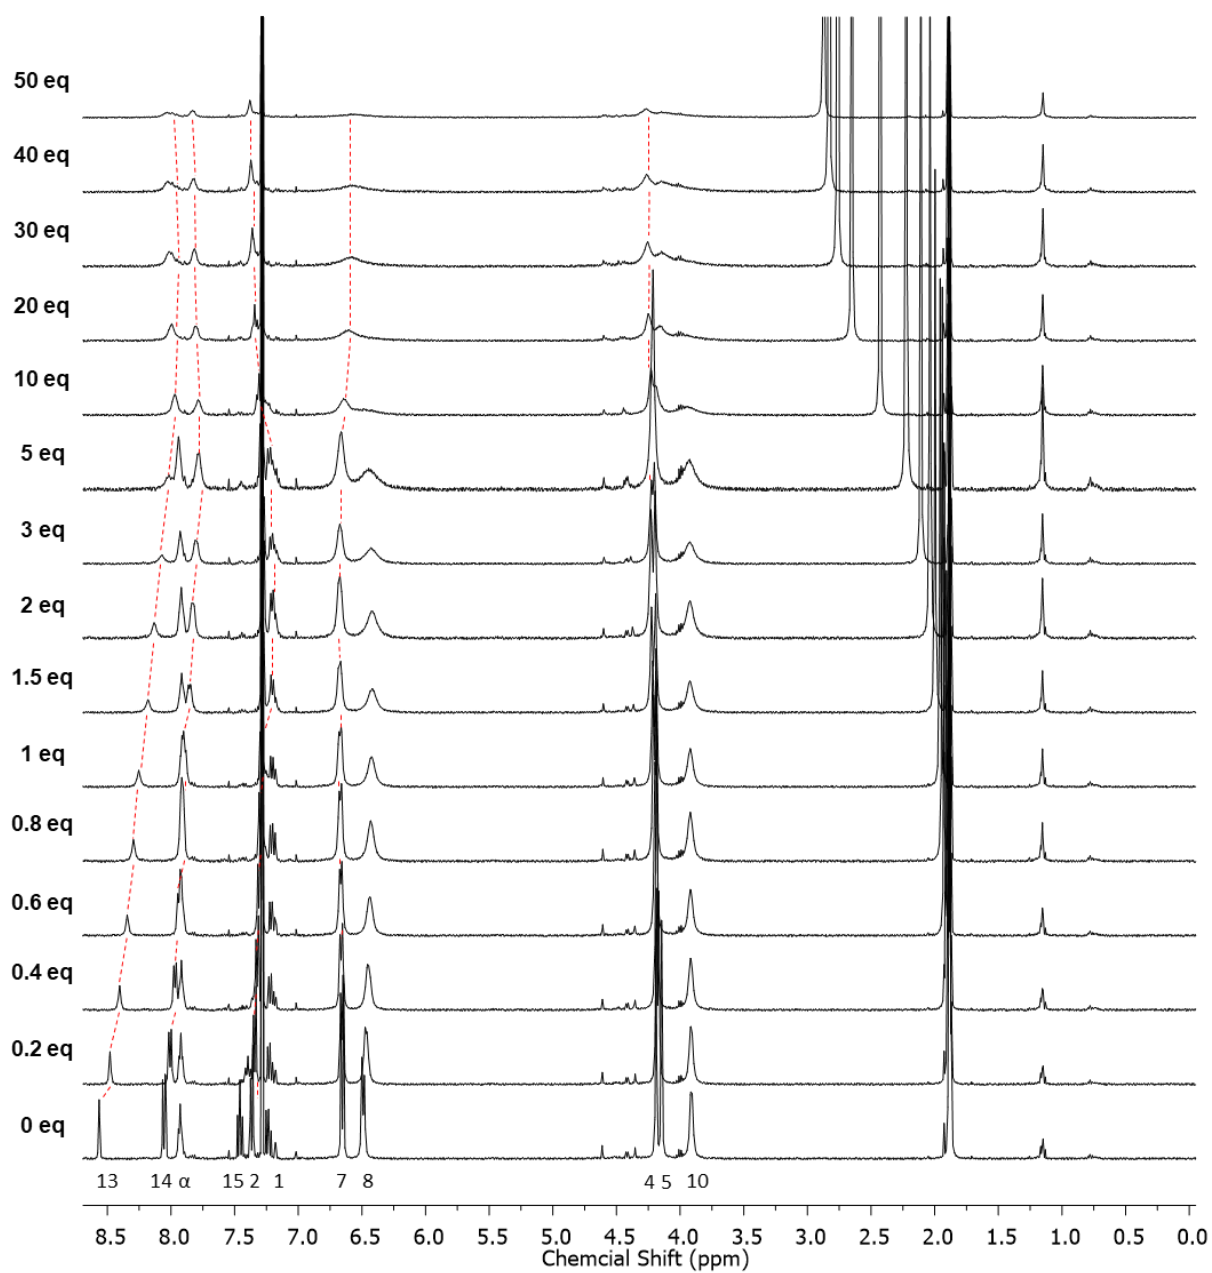

Stacked NMR spectra (400 MHz, 4:1 CDCl<sub>3</sub>:CD<sub>3</sub>CN, 298 K) of PNO [2]catenane **4** upon addition of increasing equivalents of LiClO<sub>4</sub>.

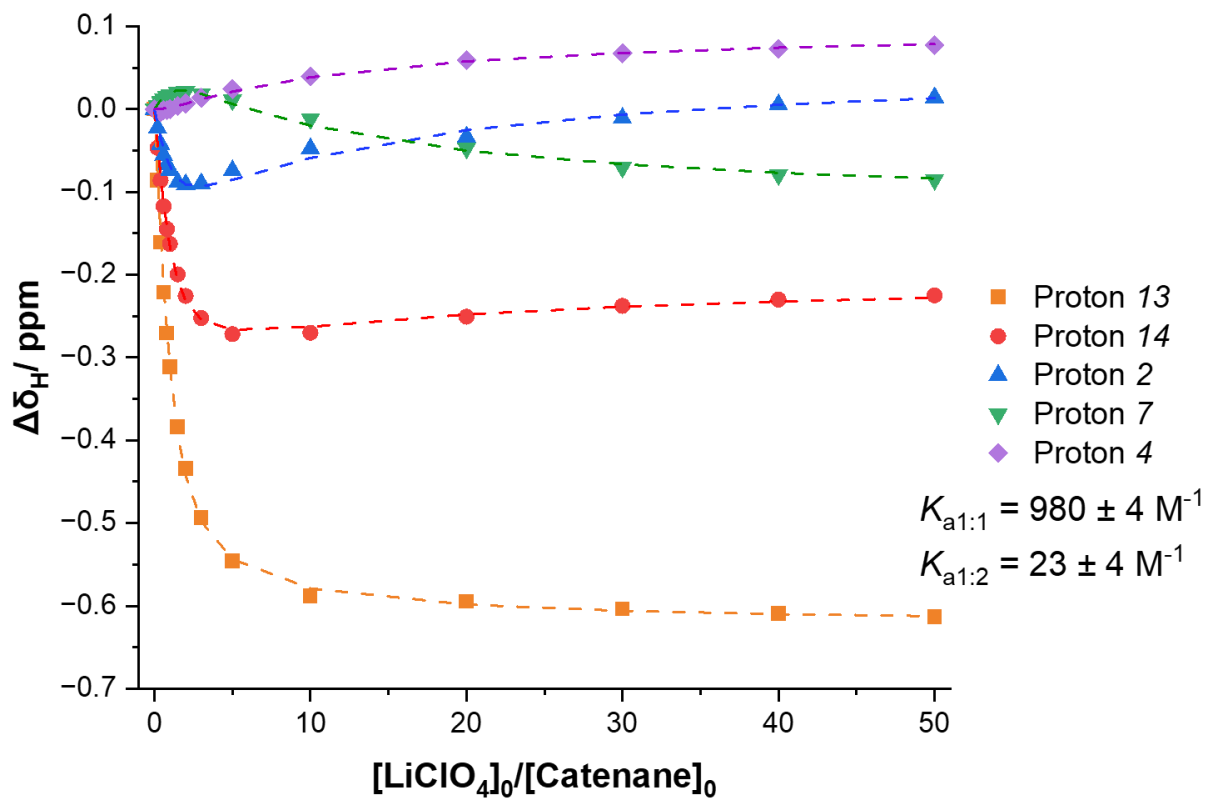

Globally fitted data (by Bindfit) for a 1:2 binding isotherm using change in peak positions against a ratio of initial LiClO<sub>4</sub> and catenane concentration.

PNO [2]catenane **4** + NaBArF

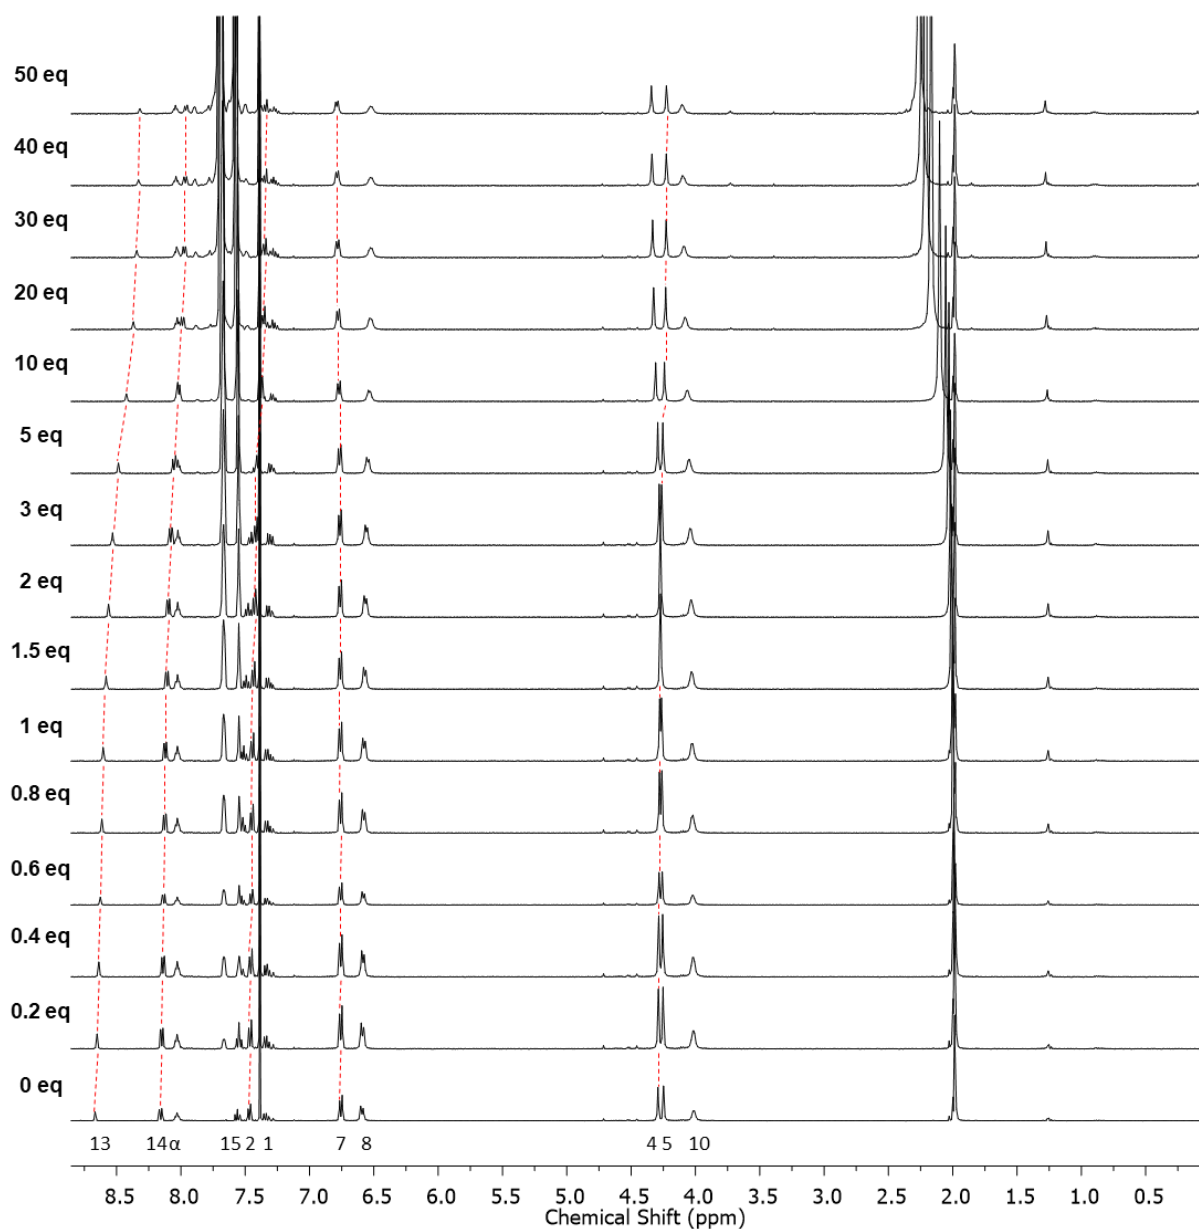

Stacked NMR spectra (400 MHz, 4:1 CDCl<sub>3</sub>:CD<sub>3</sub>CN, 298 K) of PNO [2]catenane **4** upon addition of increasing equivalents of NaBArF.

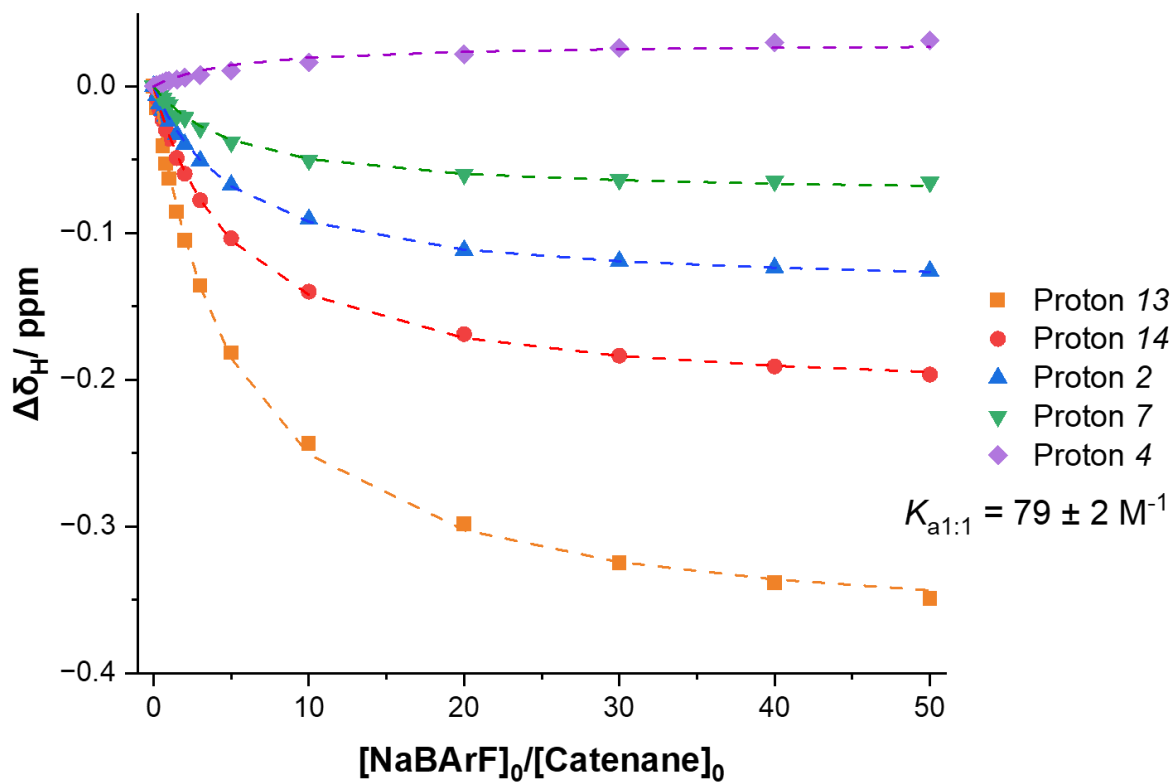

Globally fitted data (by Bindfit) for a 1:1 binding isotherm using change in peak positions against a ratio of initial NaBARF and catenane concentration.

### Part 3: Crystallographic Data

#### Pyridyl [2]catenane **2**

Single crystals of pyridyl [2]catenane **2** were grown by slow evaporation of a chloroform solution. A suitable crystal was selected and studied using an Agilent SuperNova AtlasS2 diffractometer. Using Olex2<sup>6</sup> the structure was solved with the ShelXS<sup>7</sup> structure solution program using Direct Methods and refined with the ShelXL<sup>8</sup> refinement package using Least Squares minimisation.

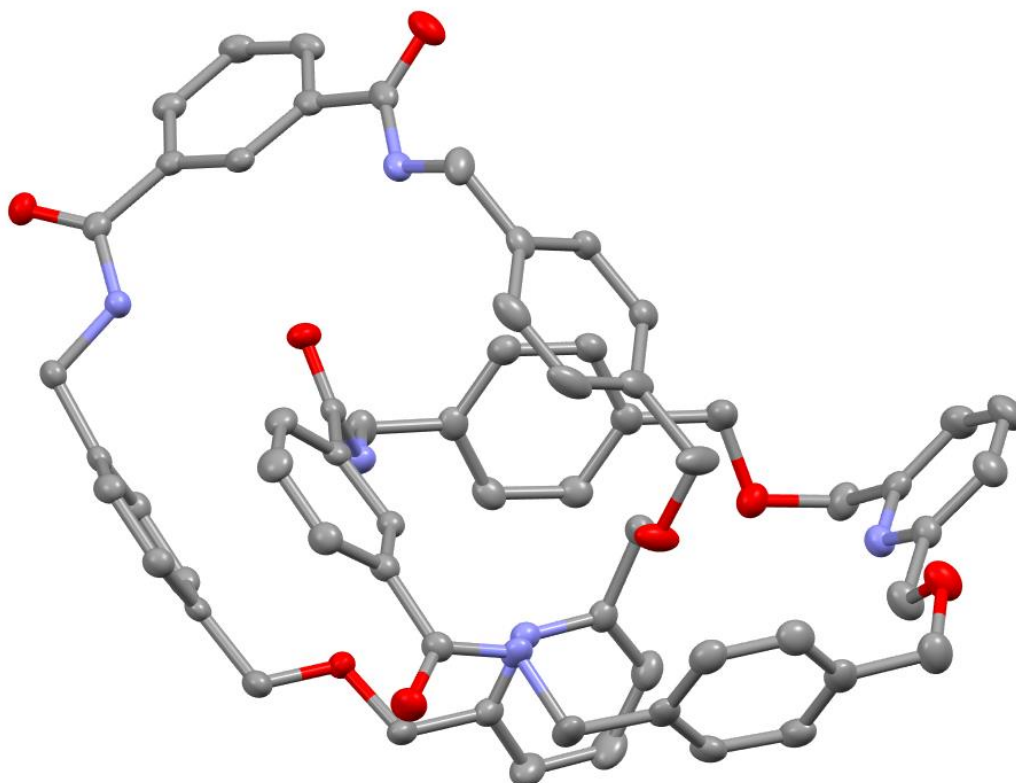

X-ray crystal structure of [2]catenane **2**. Thermal ellipsoids are displayed at 50% probability.



Crystal data and structural refinement for pyridyl [2]catenane **2**:

|                                             |                                                                |
|---------------------------------------------|----------------------------------------------------------------|
| CCDC Number                                 | 23052568                                                       |
| Empirical formula                           | C <sub>31</sub> H <sub>29</sub> N <sub>3</sub> O <sub>4</sub>  |
| Formula weight                              | 507.57                                                         |
| Temperature/K                               | 99.93(16)                                                      |
| Crystal system                              | Monoclinic                                                     |
| Space group                                 | P2 <sub>1</sub> /c                                             |
| a/Å                                         | 21.5269(2)                                                     |
| b/Å                                         | 11.10560(10)                                                   |
| c/Å                                         | 21.8729(2)                                                     |
| α/°                                         | 90                                                             |
| β/°                                         | 99.4400(10)                                                    |
| γ/°                                         | 90                                                             |
| Volume/Å <sup>3</sup>                       | 5158.32(8)                                                     |
| Z                                           | 8                                                              |
| ρ <sub>calc</sub> /cm <sup>3</sup>          | 1.307                                                          |
| μ/mm <sup>-1</sup>                          | 0.704                                                          |
| F(000)                                      | 2144.0                                                         |
| Crystal size/mm <sup>3</sup>                | 0.09 × 0.07 × 0.04                                             |
| Radiation                                   | Cu Kα (λ = 1.54184)                                            |
| 2θ range for data collection/°              | 8.196 to 148.694                                               |
| Index ranges                                | -26 ≤ h ≤ 25, -12 ≤ k ≤ 13, -19 ≤ l ≤ 27                       |
| Reflections collected                       | 32736                                                          |
| Independent reflections                     | 10318 [R <sub>int</sub> = 0.0224, R <sub>sigma</sub> = 0.0230] |
| Data/restraints/parameters                  | 10318/0/701                                                    |
| Goodness-of-fit on F <sup>2</sup>           | 1.059                                                          |
| Final R indexes [I >= 2σ (I)]               | R <sub>1</sub> = 0.0372, wR <sub>2</sub> = 0.0907              |
| Final R indexes [all data]                  | R <sub>1</sub> = 0.0439, wR <sub>2</sub> = 0.0948              |
| Largest diff. peak/hole / e Å <sup>-3</sup> | 0.54/-0.21                                                     |

## PNO [2]catenane **4**

Single crystals of PNO [2]catenane **4** were grown by slow evaporation of a chloroform solution. A suitable crystal was selected and studied using an Agilent SuperNova AtlasS2 diffractometer. Using Olex2<sup>6</sup> the structure was solved with the ShelXT<sup>7</sup> structure solution program using Direct Methods and refined with the olex2.refine<sup>9</sup> refinement package using Gauss-Newton minimisation.

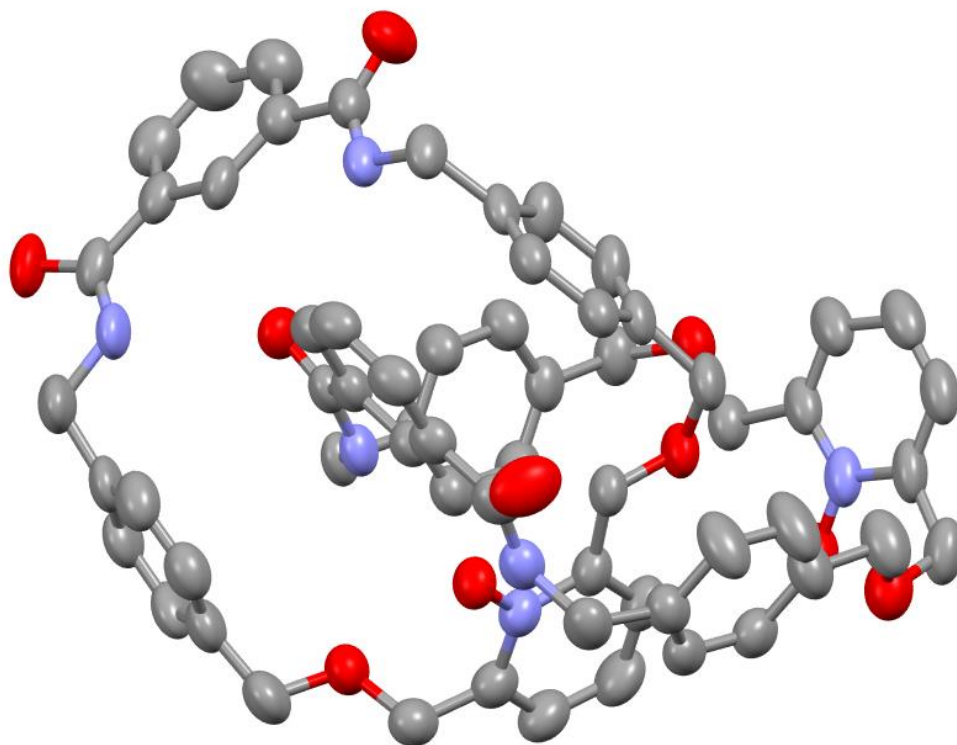

X-ray crystal structure of [2]catenane **4**. Thermal ellipsoids are displayed at 50% probability.

Crystal data and structural refinement for PNO [2]catenane **4**:

|                                             |                                                                |
|---------------------------------------------|----------------------------------------------------------------|
| CCDC Number                                 | 2305367                                                        |
| Empirical formula                           | C <sub>31</sub> H <sub>29</sub> N <sub>3</sub> O <sub>6</sub>  |
| Formula weight                              | 523.57                                                         |
| Temperature/K                               | 139.9(4)                                                       |
| Crystal system                              | Triclinic                                                      |
| Space group                                 | P-1                                                            |
| a/Å                                         | 14.6339(5)                                                     |
| b/Å                                         | 15.1689(5)                                                     |
| c/Å                                         | 16.0492(3)                                                     |
| α/°                                         | 102.718(2)                                                     |
| β/°                                         | 111.425(3)                                                     |
| γ/°                                         | 105.578(3)                                                     |
| Volume/Å <sup>3</sup>                       | 2986.62(17)                                                    |
| Z                                           | 4                                                              |
| ρ <sub>calc</sub> /cm <sup>3</sup>          | 1.164                                                          |
| μ/mm <sup>-1</sup>                          | 0.649                                                          |
| F(000)                                      | 1104.0                                                         |
| Crystal size/mm <sup>3</sup>                | 0.08 × 0.06 × 0.02                                             |
| Radiation                                   | Cu Kα (λ = 1.54184)                                            |
| 2θ range for data collection/°              | 7.02 to 154.532                                                |
| Index ranges                                | -18 ≤ h ≤ 17, -17 ≤ k ≤ 18, -20 ≤ l ≤ 19                       |
| Reflections collected                       | 48309                                                          |
| Independent reflections                     | 12420 [R <sub>int</sub> = 0.0811, R <sub>sigma</sub> = 0.0660] |
| Data/restraints/parameters                  | 12420/0/712                                                    |
| Goodness-of-fit on F <sup>2</sup>           | 1.038                                                          |
| Final R indexes [I >= 2σ (I)]               | R <sub>1</sub> = 0.0664, wR <sub>2</sub> = 0.1880              |
| Final R indexes [all data]                  | R <sub>1</sub> = 0.0876, wR <sub>2</sub> = 0.2122              |
| Largest diff. peak/hole / e Å <sup>-3</sup> | 0.31/-0.22                                                     |

## Part 4: References

- 1 (a) "Supramolecular.org – Binding Constant Calculators" can be found under <http://supramolecular.org> (accessed 15<sup>th</sup> July 2023); (b) D. B. Hibbert and P. Thordarson, *Chem. Commun.*, 2016, **52**, 12792-12805; (c) P. Thordarson, *Chem. Soc. Rev.*, 2011, **40**, 1305-1323.
- 2 Attempt to fit titration data for **4** with TFA for a 1:1 binding isotherm can be found under <http://app.supramolecular.org/bindfit/view/57e295c3-57ca-410e-8d49-72bcf343dada> (accessed 22<sup>nd</sup> June 2023).
- 3 Attempt to fit titration data for **4** with TFA for a 2:1 binding isotherm can be found under <http://app.supramolecular.org/bindfit/view/034b92d0-c048-4fa1-87e1-1601c5fe91c1> (accessed 15<sup>th</sup> July 2023).
- 4 Fitted titration data for **4** with LiClO<sub>4</sub> can be found under <http://app.supramolecular.org/bindfit/view/29ae08eb-c98c-4e4a-8538-d83822d473a7> (accessed 22<sup>nd</sup> June 2023).
- 5 Fitted titration data for **4** with NaBARF can be found under <http://app.supramolecular.org/bindfit/view/e26fdd6b-e548-42a4-80fa-da019c6239f5> (accessed 22<sup>nd</sup> June 2023).
- 6 O. V. Dolomanov, L. J. Bourhis, R. J. Gildea, J. A. K. Howard and H. Puschmann, *J. Appl. Cryst.*, 2009, **42**, 339-341.
- 7 G. M. Sheldrick, *Acta Cryst. A*, 2015, **71**, 3-8.
- 8 G. M. Sheldrick, *Acta Cryst. C*, 2015, **71**, 3-8.
- 9 L. J. Bourhis, O. V. Dolomanov, R. J. Gildea, J. A. K. Howard and H. Puschmann, *Acta Cryst. A*, 2015, **71**, 59-75.
